# Supplementary material for: Pre-stroke cognitive impairment is associated with vascular imaging pathology: a prospective observational study
Source: BMC Geriatr. 2021 Jun 14;21:362. doi: 10.1186/s12877-021-02327-2 (PMC8201706; doi:10.1186/s12877-021-02327-2)
Supplement: Supplementary file 3 — Additional file 3. [file 12877_2021_2327_MOESM3_ESM.docx]

**Supplementary table 3**

**Results of reliability testing**

The following table compares the results of the Nor-COAST reliability assessment with previously published results.

| **Inter-rater**  **agreement** | **Fazekas** | **MTA** | **PA** | **Microbleeds** | **Evans** | **Lacunes** |
| --- | --- | --- | --- | --- | --- | --- |
| Percent agreement (%) | 94.83 | 88.83 | 87.36 | 96.15 | NA | 72.41 |
| Weighted Kappa – Nor-COAST  % (Std. error) | 0.88  (0.14) | 0.55  (0.10) | 0.34  (0.10) | 0.88  (0.19) | 0.95 (ICC)  (0.90 to 0.98) | 0.29  (0.16) |
| Reliability* - Literature | 0.70(1) | 0.72 to 0.84(2) | 0.65 to 0.84(2) | 0.44  (0.32 to 0.56) | 0.91(3) | NA |
| **Intra-rater**  **agreement** | **Fazekas** | **MTA** | **PA** | **Microbleeds** | **Evans** | **Lacunes** |
| Percent agreement (%) | 90.00 | 91.3 | 88.33 | 77.78 | NA | 86.67 |
| Weighted Kappa – Nor-COAST  % (Std. error) | 0.77  (0.14) | 0.66  (0.13) | 0.29  (0.13) | 0.15  (0.16) | 0.96 (ICC)  (0.93 to 0.98) | 0.42  (0.18) |
| Reliability* - Literature | 0.79(1) | 0.83 to 0.91(2) | 0.93 to 0.95(2) | 0.72(4)  (0.62 to 0.82) | >0.9(ICC)(5) | NA |

* Reliability is estimated with weighted kappa when not stated otherwise.

1. Gouw AA, van der Flier WM, Fazekas F, van Straaten EC, Pantoni L, Poggesi A, et al. Progression of white matter hyperintensities and incidence of new lacunes over a 3-year period: the Leukoaraiosis and Disability study. Stroke. 2008;39(5):1414-20.

2. Harper L, Barkhof F, Fox NC, Schott JM. Using visual rating to diagnose dementia: a critical evaluation of MRI atrophy scales. Journal of neurology, neurosurgery, and psychiatry. 2015;86(11):1225-33.

3. Reinard K, Basheer A, Phillips S, Snyder A, Agarwal A, Jafari-Khouzani K, et al. Simple and reproducible linear measurements to determine ventricular enlargement in adults. Surgical neurology international. 2015;6:59.

4. Gregoire SM, Chaudhary UJ, Brown MM, Yousry TA, Kallis C, Jäger HR, et al. The Microbleed Anatomical Rating Scale (MARS): reliability of a tool to map brain microbleeds. Neurology. 2009;73(21):1759-66.

5. Brix MK, Westman E, Simmons A, Ringstad GA, Eide PK, Wagner-Larsen K, et al. The Evans' Index revisited: New cut-off levels for use in radiological assessment of ventricular enlargement in the elderly. European journal of radiology. 2017;95:28-32.
